1 **Genomic islands of heterozygosity maintained across caribou populations**  
2 **despite inbreeding**

3 **Maintenance of heterozygosity despite inbreeding**

4 **Kirsten Solmundson<sup>1</sup> | Jeff Bowman<sup>1,2\*</sup> | Paul J. Wilson<sup>3\*</sup> | Rebecca S. Taylor<sup>3</sup> | Rebekah L.**  
5 **Horn<sup>3</sup> | Sonésinh Keobouasone<sup>4</sup> | Micheline Manseau<sup>1,4\*</sup>**

6 <sup>1</sup>Environmental & Life Sciences Graduate Program, Trent University, 1600 West Bank Drive,  
7 Peterborough, ON, K9L 0G2, Canada

8 <sup>2</sup>Wildlife Research and Monitoring Section, Ontario Ministry of Natural Resources and Forestry, Trent  
9 University, DNA Building, Peterborough, ON K9L 0G2, Canada.

10 <sup>3</sup>Biology Department, Trent University, 1600 West Bank Drive, Peterborough, ON K9J 7B8, Canada.

11 <sup>4</sup>Landscape Science and Technology Division, Environment and Climate Change Canada, 1125 Colonel  
12 By Drive, Ottawa, ON K1S 5R1, Canada.

13 \*Co-Principal Investigators

14 **Correspondence**

15 Kirsten Solmundson, Environmental and Life Sciences, Trent University, 1600 West Bank Drive,  
16 Peterborough, ON K9J 7B8, Canada.

17 E-mail: [kirstensolmundson@trentu.ca](mailto:kirstensolmundson@trentu.ca)

18 **Present address**

19 Rebekah L. Horn, Hagerman Genetics Laboratory, 3059F National Fish Hatchery Road, Hagerman, Idaho,  
20 83332, USA.

21 **Funding information**

22 NSERC Collaborative Research & Development (CRD) grant to P.J.W., NSERC CREATE and Discovery  
23 grants to J.B. and P.J.W., and a Garfield Weston Foundation Fellowship, Ontario Graduate Scholarships,  
24 and Ontario Species at Risk Stewardship Program funding to K.S.

25 **Abstract**

26

27 Small, isolated populations are prone to inbreeding, increasing the proportion of homozygous  
28 sites across the genome that can be quantified as runs of homozygosity (ROH). Caribou  
29 (*Rangifer tarandus*) are declining across their range in Canada; thus, understanding the effects of  
30 inbreeding on genetic potential is pertinent for conserving small, isolated populations. We  
31 quantified ROH in high-coverage whole genomes of boreal caribou from small, isolated  
32 populations in southern Ontario, Canada, in comparison to caribou from the continuous range of  
33 Ontario, other caribou ecotypes in Canada, and western Greenland. Sampled populations  
34 presented divergent evolutionary histories, differing population sizes, and extents of isolation.  
35 We conducted BLAST searches across regions of elevated heterozygosity to identify genes that  
36 have maintained variation despite inbreeding. We found caribou from recently isolated  
37 populations in Ontario had a large proportion of their genome in long ROH. We observed even  
38 larger proportions but shorter ROH in western Greenland, indicating that inbreeding has occurred  
39 over a longer period in comparison to other populations. We observed the least inbreeding in  
40 barren-ground and eastern migratory caribou, which occur in larger population sizes than boreal  
41 caribou. Despite vastly different inbreeding extents, we found regions of high heterozygosity  
42 maintained across all populations. Within these islands of heterozygosity, we identified genes  
43 associated with immunity, signaling regulation, nucleotide binding, toxin elimination, and  
44 feeding behaviour regulation. In this study, we confirm inbreeding in isolated populations of a  
45 species at risk, but also uncover high variation in some genes maintained across divergent  
46 populations despite inbreeding, suggesting strong balancing selection.

47

48    **KEYWORDS**

49    Runs of homozygosity, inbreeding, islands of heterozygosity, balancing selection, conservation genomics,  
50    caribou

51

52    **1 | INTRODUCTION**

53            Small and isolated populations have limited mate choice, which increases the likelihood  
54    of inbreeding (Herfindal et al., 2014). One consequence of inbreeding is increased genome-wide  
55    homozygosity, which can be quantified as the proportion of the genome in runs of homozygosity  
56    (ROH; Szpiech et al., 2013). ROH measure the genomic level of inbreeding without making  
57    assumptions about the founders of the populations, and therefore can provide a more accurate  
58    estimate of inbreeding than traditional methods, such as a pedigree (Kardos, Luikart, &  
59    Allendorf, 2015). ROH have been used to study the consequences of persisting in small and  
60    isolated populations, such as the loss of genetic diversity and increased inbreeding that preceded  
61    the extinction of an island population of woolly mammoth (*Mammuthus primigenius*;  
62    Palkopoulou et al., 2015). More recently, ROH have been used to investigate inbreeding in  
63    species of conservation concern. A study of a Scandinavian wolf (*Canis lupus*) population  
64    revealed stretches of ROH throughout the genome of wolves born in an isolated population,  
65    whereas in immigrant wolves ROH were rare or absent (Kardos et al., 2018). Knowledge of ROH  
66    that are shared, or identical by descent, between individuals or populations is vital for designing  
67    mitigation plans and identifying potential candidates for translocations for at-risk species, as  
68    demonstrated by a recent study of isolated puma (*Felis concolor*) populations (Saremi et al.,  
69    2019).

70           Inbreeding increases the probability that an individual will receive alleles that are  
71 identical by descent (IBD), meaning the individual receives the same allele from both parents at a  
72 particular locus, resulting in increased genome-wide homozygosity (Kardos et al., 2015). This  
73 increased homozygosity can result in reduced survival or reproduction, known as inbreeding  
74 depression (Hedrick & Garcia-Dorado, 2016). Although rarely studied in wild populations,  
75 inbreeding depression is well documented in captivity; for instance, in captive bred prairie-  
76 chickens (*Tympanuchus cupido attwateri*) mortality was positively correlated with both parental  
77 relatedness and the genetic inbreeding coefficient (Hammerly, Morrow, & Johnson, 2013).  
78 Inbreeding depression is caused by two genetic effects: the increased expression of recessive  
79 deleterious alleles, and increased homozygosity at loci with heterozygote advantage  
80 (Charlesworth & Willis, 2009). Deleterious alleles are most likely to occur within long ROH,  
81 suggesting recent inbreeding enables rare deleterious variants to exist in homozygous form,  
82 resulting in inbreeding depression (Szpiech et al., 2013). The inbreeding load of a population is  
83 fueled by the appearance of recessive deleterious variants, but these alleles can be purged by  
84 purifying selection if given sufficient time, tempering the effects of inbreeding depression  
85 (Hedrick & Garcia-Dorado, 2016). Under intensive inbreeding, islands of high heterozygosity  
86 within long homozygous stretches can indicate regions that might harbour recessive deleterious  
87 alleles or be associated with heterozygote advantage under balancing selection. A study of  
88 endangered brown bears (*Ursus arctos marsicanus*) demonstrated fixation by drift of several  
89 deleterious alleles; however, high-variation was maintained in regions related to the immune  
90 system, olfactory signaling pathways, and digestion despite inbreeding, suggesting balancing  
91 selection prevents the loss of variation at important genes (Benazzo et al., 2017).

92           The caribou (*Rangifer tarandus*) is an iconic species in Canada that has experienced  
93 dramatic declines in both range and population size over the past century, raising conservation  
94 concerns (Festa-Bianchet, Ray, Boutin, Côté, & Gunn, 2011; Laliberte & Ripple, 2004). Caribou  
95 are a religious, cultural, and social symbol to many Indigenous people in Canada, as well as an  
96 important food source in some communities (Festa-Bianchet et al., 2011; Polfus et al., 2016).  
97 Caribou diversity is described by different subspecies and ecotypes, which differ in morphology  
98 and behaviour; for example, barren-ground caribou (*R. t. groenlandicus*) congregate in large,  
99 migratory groups on the tundra (COSEWIC, 2016). Conversely, the woodland subspecies (*R. t.*  
100 *caribou*) has several ecotypes associated with different habitats such as caribou found in the  
101 mountains across western Canada (COSEWIC, 2014b), the eastern migratory caribou that  
102 migrate between the boreal forest and the tundra in eastern Canada (COSEWIC, 2017a), and  
103 boreal caribou that are more sedentary and found throughout the boreal forest (COSEWIC,  
104 2014a). The diversity found in caribou has resulted in the classification of 12 Designatable Units  
105 by the Committee on the Status of Endangered Wildlife in Canada (COSEWIC, 2011). Despite  
106 this diversity, all caribou in Canada are currently listed as at risk of extinction (Special Concern,  
107 Threatened, or Endangered) by COSEWIC (COSEWIC, 2014-2017).

108           Recent declines in caribou ranges and population sizes have resulted in small and isolated  
109 populations, particularly within the sedentary boreal ecotype (COSEWIC, 2014). In Ontario, the  
110 range of boreal caribou has been contracting northward for over a century, resulting in isolated  
111 populations that have managed to persist along the coast and nearshore islands of Lake Superior,  
112 over 150 km south of the continuous range edge (Ontario Ministry of Natural Resources, 2009;  
113 Schaefer, 2003). Here, we analyze inbreeding in boreal caribou from Ontario where the range has  
114 recently receded, in comparison to boreal caribou from the continuous range in Ontario and

115 Manitoba, and other caribou ecotypes in central and eastern Canada, and western Greenland. We  
116 included eastern migratory caribou from populations in Quebec and Ontario that have  
117 experienced historic and recent declines (COSEWIC, 2017a), as well as barren-ground caribou  
118 from a large population that has not experienced dramatic historic or recent declines (COSEWIC,  
119 2016). We also included two individuals from western Greenland, where populations have  
120 declined by up to 90% in the past two decades (Jepsen, Siegismund, & Fredholm, 2002) despite  
121 absence of major predators (Cuyler & Østergaard, 2005). Previous research has indicated high  
122 levels of inbreeding in the Greenland population we sampled (Jepsen et al., 2002; Taylor et al.,  
123 2020).

124         Rapid declines in caribou range and population sizes have raised conservation concerns,  
125 as small and isolated populations are more prone to inbreeding and eventually may fall into an  
126 “extinction vortex” and become extirpated (Gagnon, Yannic, Perrier, & Côté, 2019; Gilpin &  
127 Soule, 1986). Yet, it remains unclear how inbreeding is affecting caribou, and whether inbreeding  
128 depression is a pertinent threat. A recent study correlated heterozygosity and fitness in two  
129 rapidly declining eastern migratory caribou populations, and found no evidence of inbreeding  
130 depression (Gagnon et al., 2019). However, the two eastern migratory populations studied by  
131 Gagnon et al. (2019) have historically experienced dramatic fluctuations in population size  
132 (COSEWIC, 2017a), which may have allowed for the purging of recessive deleterious alleles.  
133 The effects of inbreeding depression can be resisted by selection preventing the unmasking of  
134 deleterious recessive alleles or maintaining heterozygote advantage (Hedrick & Garcia-Dorado,  
135 2016). Balancing selection, specifically, negative-frequency dependent selection has recently  
136 been associated with maintaining phenotypic polymorphisms in caribou along an environmental  
137 gradient in western Canada (Cavedon et al. 2019), but has not been linked to inbreeding.

138           We used whole genome sequences to investigate inbreeding in small and isolated  
139 populations of boreal caribou from southern Ontario, boreal caribou populations from the  
140 continuous caribou range of Ontario and Manitoba, eastern migratory caribou, barren-ground  
141 caribou, and caribou from western Greenland (Figure 1). We sampled caribou from populations  
142 that differed in evolutionary history, demographic history and extent of isolation. We predicted to  
143 find a large proportion of genomic ROH in boreal caribou from the southern range of Ontario  
144 (Figure 1), where recent range contraction has resulted in small and isolated populations (Drake  
145 et al., 2018; Schaefer, 2003). We expected to detect lower levels of inbreeding, quantified as  
146 ROH, in boreal caribou from the continuous range of Ontario and Manitoba, as well as in the  
147 eastern migratory caribou from Ontario and Quebec; populations that have experienced recent  
148 declines but are not as small and isolated as the southern range of Ontario (COSEWIC, 2014a,  
149 2017a). Further, we predicted barren-ground caribou from the Qamanirijuaq population ranging  
150 over northern Manitoba and Nunavut (Figure 1) will have the lowest proportion of their genome  
151 in ROH, as they occur in large populations that have not experienced dramatic historical or recent  
152 declines (COSEWIC, 2016). Continuous stretches of ROH are broken up by the recombination of  
153 DNA through successive mating events (Ceballos, Joshi, Clark, Ramsay, & Wilson, 2018); thus,  
154 we expected to find the longest ROH in boreal caribou from the southern range of Ontario,  
155 reflecting recent inbreeding caused by anthropogenic range contraction (Schaefer, 2003). Caribou  
156 from western Greenland have likely experienced inbreeding over a longer period of time (Jepsen  
157 et al., 2002); thus, we predicted a large proportion of their genome will be in short ROH. Finally,  
158 we predicted to find genes associated with deleterious recessive alleles or heterozygote advantage  
159 in regions where balancing selection has maintained islands of heterozygosity despite inbreeding  
160 (Benazzo et al., 2017).

161

## 162 **2| METHODS**

### 163 **2.1 | Caribou sampling**

164 Tissue samples of three boreal caribou were collected from the southern caribou range of  
165 Ontario (two samples from Michipicoten Island, one from Pukaskwa National Park) by  
166 provincial biologists and sequenced for the study. Whole-genome raw reads from the continuous  
167 caribou range of Ontario, Manitoba, Quebec, and Greenland (Taylor et al. 2020) were used for  
168 the remaining populations and can be retrieved from the National Centre for Biotechnology  
169 (NCBI) under the BioProject Accession no. PRJNA 634908.

170 We included four samples from south of the continuous boreal caribou range in Ontario:  
171 two samples from the Michipicoten Island and one from the coastal range of Lake Superior  
172 (Pukaskwa National Park), as well as one individual from where the continuous caribou range  
173 has more recently contracted near Ignace, Ontario (Figure 1). The caribou population on  
174 Michipicoten Island was established in the 1980s, when a single bull was sighted on the island  
175 and eight additional caribou were translocated from the Slate Islands (Bergerud, Dalton, Butler,  
176 Camps, & Ferguson, 2007). The Michipicoten Island population steadily grew, and was estimated  
177 to contain 680 caribou in 2011 (Kuchta, 2012); however an especially cold winter in 2014  
178 resulted in ice corridors between the mainland and islands, allowing wolves to colonize the island  
179 (Ontario Ministry of Natural Resources, 2018). The caribou population rapidly declined under  
180 this new predation pressure, prompting the Government of Ontario to work with partners,  
181 including Michipicoten First Nation, to translocate some of the few remaining caribou on  
182 Michipicoten Island to other Lake Superior islands: the Slate Islands and Caribou Island (Ontario



183 Ministry of Natural Resources, 2018). Over the past four decades, the coastal caribou population  
184 in Pukaskwa National Park has steadily declined and become increasingly isolated from the  
185 continuous caribou range of Ontario (Patterson et al., 2014). Caribou disappeared from the park  
186 in 2011, and reappeared in 2015, perhaps due to colonization from one of the Lake Superior  
187 islands. One of the last caribou captured on wildlife cameras deployed in Pukaskwa National  
188 Park had small, malformed antlers, which was suggested to be a sign of inbreeding (Drake et al.,  
189 2018). Currently, there are no caribou in the park and the population is considered potentially  
190 extirpated.

191 We also selected one sample from Cochrane, Ontario, which falls along the southern edge  
192 of the continuous boreal caribou range and two samples from the Naosap population in Manitoba,  
193 which falls within the continuous range and in 2012 was estimated to contain 100-200 caribou  
194 (COSEWIC, 2014a). We selected two barren-ground caribou samples from the Qamanirijuaq  
195 population that ranges over northern Manitoba and Nunavut, a large population that was  
196 estimated to contain 264,661 individuals in 2014 and has not experienced dramatic historical or  
197 recent declines (COSEWIC, 2016). Within the eastern migratory ecotype, we included two  
198 samples from the George River population, Quebec, which has experienced a dramatic  
199 population decline over recent decades from approximately 823,000 individuals in 1993  
200 (Couturier, Courtois, Crépeau, Rivest, & Luttich, 1996), to approximately 8,900 individuals in  
201 2016 (Gagnon et al., 2019); our samples were obtained in 2008, after population declines had  
202 already occurred. We also included two eastern migratory caribou from the Pen Island population  
203 in northern Ontario, which was estimated to contain 16,638 individuals in 2011 (COSEWIC,  
204 2017a). The eastern migratory caribou populations in Ontario and Quebec are geographically

205 isolated from each other (Figure 1) and recent research has revealed a divergent evolutionary  
206 history between these two populations (Taylor et al., 2020). Finally, we selected two samples  
207 from the Kangerlussuaq area of western Greenland, where populations have declined by up to  
208 90% in the past two decades (Jepsen et al., 2002). Caribou from this region are geographically  
209 separated by the Maniitsoq glacier and have not hybridized with semi-domestic reindeer, unlike  
210 some caribou from other regions in Greenland (Jepsen et al. 2002).

211

## 212 **2.2 | Genome sequencing, assembly, and quality control**

213 DNA was extracted from the tissue samples using the Qiagen DNeasy kit and following  
214 manufacturer's protocols (Qiagen, Hilden, Germany). The extracted DNA was then quantified  
215 using a Qubit system (Thermo Fisher Scientific, MA, USA) to ensure all samples were above the  
216 minimum threshold required for next-generation sequencing (20ng/μL). The extracted DNA was  
217 then sent to The Centre for Applied Genomics (TCAG), at The Hospital for Sick Children  
218 (Toronto, ON). An Illumina library prep kit (Illumina, San Diego, CA, USA) was used to  
219 fragment the DNA and apply sequencing adapters. Each sample was sequenced on one lane of  
220 the Illumina HiSeqX platform, yielding paired-end 150bp sequence reads. The raw reads of most  
221 samples (N=12) are already available at the National Centre for Biotechnology (NCBI) under the  
222 BioProject Accession no. PRJNA 634908. The raw reads of the remaining individuals (N=3) will  
223 be made available by time of publication.

224 We conducted all bioinformatic analyses using cloud computing resources from Compute  
225 Canada (RRG gme-665-ab) and Amazon Web Services (<https://aws.amazon.com/>). First, we  
226 removed sequencing adapters and low-quality bases (phred score <30) from the samples using  
227 CutAdapt (Martin, 2011) in the program TrimGalore 0.4.2 (Krueger, 2012). We mapped the

228 sequenced reads to the caribou reference genome (Taylor et al., 2019) using Bowtie2 2.3.0  
229 (Langmead & Salzberg, 2012). We used Samtools 1.5 (Li et al., 2009) to convert the SAM file to  
230 a BAM file. We then removed duplicate reads and added read group information to each BAM  
231 file with Picard 2.17.3 (Broad Institute, n.d.). We sorted the BAM file with Samtools 1.5 and  
232 built an index with Picard 2.17.3. Finally, we checked the quality of each BAM file using FastQC  
233 0.11.8 (Andrews, 2010) and calculated the average depth of coverage in ROHan (Renaud,  
234 Hanghoj, Korneliussen, Willerslev, & Orland, 2019). All samples (N=15) passed the FASTQC  
235 quality assessments and had a high depth of coverage (28-36x; Table 1).

236 We used the GATK 3.8 (McKenna et al., 2010) Haplotype Caller to produce a variant call  
237 format (VCF) file for each caribou. We further used GATK 3.8 to combine and genotype the  
238 GVCFs, producing one joint VCF for all samples. We then used VCFtools 0.1.14 (Danecek et al.,  
239 2011) to perform additional filtering. We removed indels, sites with a depth <10 or >80, and low-  
240 quality genotype calls (score <20). We also filtered to remove genotypes with more than 10%  
241 missing data. We did not filter to remove any SNP with a minor allele frequency (MAF) of less  
242 than 0.05 as we have only one or two individuals from each location, and thus did not want to  
243 remove private sites. The combined VCF file with all caribou contained 28 246 751 SNPs.

### 244 **2.3 | Inbreeding analyses**

245 With the combined VCF file, we used VCFtools 0.1.14 (Danecek et al., 2011) to calculate  
246 the inbreeding coefficients (F) and relatedness ( $\phi$ ) based on the KING inference (Manichaikul et  
247 al., 2010) for all individuals. We also used VCFtools 0.1.14 to calculate a grouped  
248 transition/transversion ratio.

249 We identified runs of homozygosity (ROH) and calculated global heterozygosity rate ( $\theta$ )  
250 from the individual BAM files using the program ROHan (Renaud et al., 2019). ROHan uses a

251 Bayesian approach to identify ROH with a Hidden Markov Model (HMM). For all ROHan  
252 analyses we used a sliding window size of 50kb, allowed a maximum heterozygosity level of  
253 0.0005 within ROH, and specified a transition/transversion ratio of 1.97428, based on our  
254 calculation from a VCF file that contained all individuals.

255 ROHan produced a file of heterozygosity estimates for every 50kb window across the  
256 genome, as well as a file with the location and length of each ROH. We then plotted the  
257 heterozygosity estimates and ROHs across scaffolds of interest to compare patterns between  
258 individuals using ggplot2 in R (Wickham, 2016). Namely, from the 40 largest scaffolds,  
259 representing approximately 43% of the caribou reference genome, we selected scaffolds where  
260 the lower local heterozygosity estimate ( $\theta$ ) exceeded 0.02 (Table S2). We excluded elevated  
261 heterozygosity estimates that were located on the edges of scaffolds, as they may be due to  
262 sequence error. Within populations where inbreeding was detected ( $F_{ROH} > 0.1000$ ), we also  
263 calculated how many ROH are identical by descent (IBD) or unique using the intersect function  
264 in BEDtools (Quinlan & Hall, 2010).

265 We then conducted BLAST searches across regions of elevated heterozygosity to identify  
266 genes that have maintained heterozygosity despite inbreeding. We used NCBI's nucleotide  
267 MegaBLAST algorithm (Agarwala et al., 2016) and masked for lower case letters, as our  
268 reference genome contains both hard and soft masking (Taylor et al., 2019). All other BLAST  
269 settings were default.

270

## 271 **3 | RESULTS**

### 272 **3.1 | Inbreeding estimates**

273 The inbreeding coefficient ( $F$ ) calculated in VCFtools for each individual from the  
274 grouped VCF file was highly correlated with genome-wide heterozygosity ( $\theta$ ) and the proportion  
275 of the genome in ROH ( $F_{ROH}$ ), which were both calculated in ROHan (Renaud et al., 2019) from  
276 individual BAM files (Figure S2).

277 The highest  $F_{ROH}$  values were observed in the two caribou from western Greenland ( $F_{ROH}$   
278 = 0.3373, 0.5017), with ROH comprising half of the genome of one of the individuals (Figure 1).  
279  $F_{ROH}$  values were also elevated in boreal caribou from Ignace, Ontario that have recently become  
280 isolated from the continuous caribou range due to northward range contraction ( $F_{ROH} = 0.2398$ ),  
281 as well as in boreal caribou from Lake Superior (Pukaskwa National Park and Michipicoten  
282 Island) that are located over 150 km south of the continuous range edge ( $F_{ROH} = 0.1000 - 0.1902$ ;  
283 Figure 1). The remaining individuals had  $F_{ROH}$  values between 0.0123 and 0.0963, with the two  
284 notably lowest values corresponding to barren-ground caribou (Table 1).

285 We investigated the average length of ROH across each genome to estimate whether  
286 inbreeding occurred recently or historically; the two individuals with the longest average ROH  
287 were observed in populations located south of the continuous caribou range in Ontario (Ignace  
288 and Michipicoten Island). Caribou from western Greenland also had long ROH, although they  
289 were shorter than predicted based on  $F_{ROH}$  (Figure 2).

290

### 291 **3.2 | Identical by descent ROH**

292 We calculated relatedness between all individuals ( $\phi$ ; Table S1), as well as how many  
293 ROH were identical by descent (IBD) for populations where  $F_{ROH}$  was greater than 0.10 (Table 1)  
294 to gain further insights into their inbreeding histories.

295           The two boreal caribou (*R. t. caribou*) from Michipicoten Island, Ontario shared 333 of  
296 their ROH, corresponding to 38% IBD ROH. The two Michipicoten Island caribou were related  
297 to each other ( $\phi = 0.08$ ) but were not related to any other population examined, based on negative  
298 relatedness values (Table S1). We then compared other Ontario boreal caribou to determine how  
299 many segments were shared with either individual from Michipicoten Island. A caribou from a  
300 nearby mainland in Pukaskwa National Park, Ontario shared 62% (N=1028) of its ROH with  
301 both individuals from Michipicoten Island but was not related to the Michipicoten caribou (Table  
302 S1). The boreal caribou with the highest inbreeding estimate ( $F_{\text{ROH}} = 0.23$ ) was from Ignace,  
303 Ontario, and shared 83% (N=713) of ROH segments with the Michipicoten Island caribou and  
304 also showed no evidence of relatedness to the island caribou (Table S1). Out of the Ontario  
305 boreal caribou sampled, an individual from Cochrane, Ontario shared the lowest amount (N=329)  
306 of ROH segments with Michipicoten Island, corresponding to 59% ROH that were IBD, and  
307 showed no evidence of relatedness to Michipicoten caribou (Table S1). The caribou from  
308 Cochrane also had undergone less inbreeding than the other Ontario boreal caribou sampled  
309 (Table 1).

310           Caribou from western Greenland had the highest counts of shared ROH (N=2406),  
311 corresponding to a proportion of 92% of ROH segments that were IBD. However, the relatedness  
312 estimate ( $\phi$ ) between these two individuals was 0.09, corresponding to 2<sup>nd</sup> degree ( $\phi = 0.125$ ) or  
313 3<sup>rd</sup> degree relatives ( $\phi = 0.0625$ ), which would increase the proportion of the genome that is IBD.  
314 The two caribou from western Greenland shared low relatedness values with all of the Canadian  
315 caribou (Table S1).

316

### 317 **3.3 | Islands of heterozygosity**

318           We found multiple regions across the genome where high heterozygosity was maintained  
319 across all populations, even in individuals that have experienced high levels of inbreeding. In the  
320 40 largest scaffolds, which represented approximately 43% of the caribou genome, we found 17  
321 scaffolds that had a peak of heterozygosity exceeding 0.02 (Table S2). Caribou from western  
322 Greenland had many segments of ROH, and boreal caribou from the southern discontinuous  
323 range of Ontario had notably long, continuous segments; however, we found breaks in the ROH  
324 when plotted across these regions of elevated heterozygosity (Figure 3). Using BLAST  
325 (Agarwala et al., 2016), we were able to detect functional genes within eight of these islands of  
326 heterozygosity with various functions including signaling regulation, nucleotide binding, and the  
327 regulation of feeding behaviour. Several of the genes we identified have functions associated  
328 with immunity (Figure 3A-D), including: tyrosine kinase (TxK), a member of the PRAME  
329 family, and an immunoglobulin superfamily member (IgSF10). An island of heterozygosity on  
330 Scaffold 2797 (Figure 3D) contains prolactin (PRL), a gene best known for its role in  
331 reproduction, which has also been associated with immunity (Borba, Zandman-Goddard, &  
332 Shoenfeld, 2018). Some of the genes we detected have known polymorphisms, such as UDP-  
333 Glucuronosyltransferase (UGT) on Scaffold 3054 (Figure 3E), which functions in the elimination  
334 of toxins (Miners, McKinnon, & Mackenzie, 2002). We also found heterozygosity had been  
335 maintained within a region on Scaffold 3761 (Figure 3F) that was identified as Ankyrin Repeat  
336 Domain 26 (ANKRD26), a gene associated with feeding behaviour (Bera et al., 2008). When the  
337 caribou scaffolds are aligned to the bovine genome (National Center for Biotechnology  
338 Information, 2016), the scaffolds map to the respective bovine chromosomes that include each of  
339 these genes, validating our findings.

340

## 341 4 | DISCUSSION

342 We analyzed high-coverage whole genomes to investigate inbreeding extent in caribou  
343 from divergent populations in Canada and Greenland. We quantified ROH in high-coverage  
344 whole genomes of boreal caribou from small, isolated populations in the southern caribou range  
345 of Ontario, Canada, in comparison to caribou from the continuous range of Ontario, other caribou  
346 ecotypes in Canada, and western Greenland; populations presenting divergent evolutionary  
347 histories, differing in population size and extent of isolation. As predicted, we found boreal  
348 caribou from the southern range of Ontario had a relatively high proportion of their genomes in  
349 ROH ( $F_{ROH} = 0.1000, 0.2398$ ), where recent range contraction has resulted in small and isolated  
350 populations (Figure 1). We also observed the longest average ROH in this region, namely in  
351 boreal caribou from Michipicoten Island, and Ignace Ontario, confirming their inbreeding  
352 occurred recently. Conversely, we found the lowest levels of inbreeding in barren-ground caribou  
353 from the Qamanirjuaq population in Manitoba, which was predicted as this large population has  
354 not experienced dramatic historic or recent declines (COSEWIC, 2016). All of the other  
355 Canadian caribou populations investigated had relatively low levels of inbreeding (Table 1). We  
356 examined two caribou from the Kangerlussuaq population in western Greenland, as previous  
357 research has indicated inbreeding in this population (Jepsen et al., 2002; Taylor et al., 2020), and  
358 found an extremely high proportion of ROH ( $F_{ROH} = 0.3373, 0.5017$ ). Their genomes were  
359 comprised of some long ROH, although they were shorter than expected based on  $F_{ROH}$  (Figure  
360 2), indicating their inbreeding has occurred over a longer period of time than that of other  
361 populations, as we predicted. Finally, we predicted that we would find genes associated with  
362 deleterious recessive alleles or heterozygote advantage within regions where balancing selection



363 has maintained islands of heterozygosity despite inbreeding. We detected islands of  
364 heterozygosity on 18 of the 40 scaffolds examined and found breaks in the ROH when plotted  
365 across the islands. We identified functional genes within several of the islands that are associated  
366 with various functions, including immunity, the elimination of toxins, and a deleterious recessive  
367 condition associated with the regulation of feeding behaviour.

368

#### 369 **4.1 | Inbreeding histories**

370 We observed the lowest inbreeding estimates in barren-ground caribou from the  
371 Qamanirijuaq population in Manitoba. These caribou occur in large populations on the tundra and  
372 previous research has indicated the barren-ground caribou included in this study have admixed  
373 with other caribou ecotypes (Taylor et al., 2020), which was reflected by their low inbreeding  
374 estimates; in fact, the only negative inbreeding coefficients ( $F$ ) observed were in barren-ground  
375 caribou from the Qamanirijuaq population, indicating outbreeding has occurred.

376 We found the highest prevalence of genomic inbreeding in caribou from western Greenland,  
377 whose genomes were 0.3373 and 0.5017 in ROH. Although extreme, these results are  
378 comparable to the uppermost ROH estimates of other studies; for example, inbred Scandinavian-  
379 born wolves have up to 0.54 of their genome in ROH (Kardos et al., 2018). The two individuals  
380 from western Greenland also shared a large proportion of those ROH that were IBD (92%). This  
381 is notably higher than other values in the literature. For example, a recent study of pumas  
382 reported a maximum of 36% IBD between two individuals who had similar inbreeding estimates  
383 as the western Greenland caribou ( $F_{ROH} = 0.5 - 0.6$ ). However, our results also show that the two  
384 caribou from Greenland were 2<sup>nd</sup> or 3<sup>rd</sup> degree relatives, which elevates the proportion of the  
385 genome that is shared, or IBD.

386 In recent decades, native caribou of western Greenland have experienced population  
387 reductions of up to 90% (Jepsen et al., 2002). A microsatellite study of several caribou regions in  
388 western Greenland investigated the region included in our study, near Kangerlussuaq, and found  
389 high inbreeding coefficients at two of five loci investigated (Region 1; Jepsen et al., 2002).  
390 Despite evident inbreeding, caribou from the Kangerlussuaq region were polymorphic at all 5  
391 loci investigated, unlike another isolated region that had lost several polymorphisms (Jepsen et al.  
392 2002). Our analysis of whole genome sequences echoes this finding, as we find islands of  
393 heterozygosity maintained within several genes, despite extremely high inbreeding estimates  
394 ( $F_{ROH} = 0.3373, 0.5017$ ). The high heterozygosity within these genes suggests they may be under  
395 balancing selection; thus, loss of heterozygosity at these loci may result in lowered fitness, or  
396 inbreeding depression. Although we also observed long ROH in caribou from western Greenland,  
397 they were shorter than predicted based on  $F_{ROH}$ , suggesting inbreeding occurred more historically  
398 in western Greenland than it has in the other inbred populations investigated. Our results indicate  
399 western Greenland caribou have undergone inbreeding over a longer time scale, which may have  
400 allowed for the purging of deleterious alleles. The maintenance of islands of heterozygosity  
401 within ROH suggests that inbred caribou may have enough genomic variation to avoid the fitness  
402 consequences of inbreeding depression. Indeed, despite our finding that caribou from the  
403 Kangerlussuaq region of western Greenland are extremely inbred, previous studies have found  
404 this population and the neighbouring population in Akia have notably high fertility, and are two  
405 of the only caribou populations in the world where twinning has been observed (Cuyler &  
406 Østergaard, 2005).

407 We examined the lengths of ROH to estimate if inbreeding occurred recently, resulting in  
408 long, continuous ROH, or historically, resulting in many short ROH. The longest average ROH

409 were observed near the current southern edge of the boreal caribou range in Ignace, Ontario,  
410 suggesting recent isolation caused by range contraction. This result is congruent with the findings  
411 of a microsatellite study that suggested recent genetic erosion, a decrease in connectivity, and an  
412 increase in inbreeding along the southern continuous range edge of boreal caribou in Ontario and  
413 Manitoba (Thompson, Klütsch, Manseau, & Wilson, 2019). The second longest average ROH  
414 was observed on Michipicoten Island, Ontario, an isolated population that has experienced  
415 several recent bottlenecks (Bergerud et al., 2007; Fletcher, 2017). We also found the two caribou  
416 sampled from Michipicoten Island were related to each other but were not related to a caribou  
417 from the nearby coastal range in Pukaskwa National Park (Table S1). Notably, the caribou from  
418 Cochrane has undergone less inbreeding than the other Ontario boreal caribou sampled and had  
419 the least IBD ROH with the Michipicoten Island caribou. Previous research based on  
420 microsatellite data suggested Michipicoten Island and Pukaskwa National Park belong to a  
421 different genetic cluster than the nearby boreal caribou from Cochrane (Drake et al., 2018).  
422 Additionally, a recent genomic study found that boreal caribou from Cochrane, Ontario are  
423 genetically more similar to eastern migratory caribou from Quebec than they are to boreal  
424 caribou from Ignace, Ontario (Taylor et al., 2020), providing further evidence that there may be  
425 divergent evolutionary histories between these populations.

426

## 427 **4.2 | Islands of heterozygosity**

428 Despite vastly different inbreeding histories among populations, we found regions of high  
429 heterozygosity that were maintained across all individuals, regardless of population size or  
430 ecotype. We identified functional genes within each of these peaks, with various functions  
431 including signaling regulation, nucleotide binding, and the elimination of toxins. Several of the

432 genes we identified are associated with immunity, such as prolactin (PRL), which has been linked  
433 to both reproduction and immunity (Borba et al., 2018), and tyrosine kinase (TxK), which plays a  
434 role in T-cell development (Sommers et al., 1999). Benazzo et al. (2017) found similar evidence  
435 of balancing selection for genes associated with immune and olfactory systems, where non-  
436 random peaks of variation were maintained despite extreme inbreeding in endangered brown  
437 bears. We also found a gene that may have maintained variation due to the presence of a  
438 deleterious recessive allele. We found high heterozygosity within a region that contains  
439 ANKRD26, a gene associated with the regulation of feeding behaviour. Previous research has  
440 demonstrated homozygosity at this gene results in metabolic defects in mammals, including  
441 increased obesity and insulin resistance (Bera et al., 2008).

442 In a recent study of two eastern migratory caribou populations, correlations between  
443 heterozygosity and fitness (HFCs) found no evidence of inbreeding depression (Gagnon et al.,  
444 2019). Notably, eastern migratory caribou from one of these population were also included in our  
445 study and had relatively low inbreeding estimates ( $F_{ROH} = 0.05-0.07$ ). The inbreeding levels in  
446 that population may be too low to trigger inbreeding depression, but it is also possible that the  
447 effects of inbreeding depression have been resisted by selection. Balancing selection can prevent  
448 the unmasking of deleterious recessive alleles or maintain heterozygote advantage thereby  
449 preventing the expression of inbreeding depression (Hedrick & Garcia-Dorado, 2016). In this  
450 study, we found islands of heterozygosity at specific gene regions across populations differing in  
451 population size and extent of isolation. This result suggests that strong balancing selection could  
452 be maintaining heterozygosity even in the face of extreme inbreeding. Balancing selection,  
453 specifically negative-frequency dependent selection, has also recently been suggested to be a

454 mechanism maintaining phenotypic polymorphisms in caribou along an environmental gradient  
455 in western Canada (Cavedon et al., 2019).

456

### 457 **4.3 | Conclusions**

458 We used runs of homozygosity (ROH) to quantify inbreeding in caribou from populations  
459 representing divergent evolutionary histories, differing in population size and extent of isolation.  
460 We explored the extent of inbreeding and the maintenance of genomic variation in high-coverage  
461 whole genomes of boreal caribou from small, isolated populations in the southern caribou range  
462 of Ontario, Canada, in comparison to caribou from the continuous range of Ontario, other caribou  
463 ecotypes in Canada, and western Greenland. We found divergent demographic histories among  
464 populations, particularly within the boreal ecotype, where we found low levels of inbreeding in  
465 caribou from the continuous boreal range, and elevated inbreeding estimates in populations that  
466 have become isolated due to recent range contraction. We also observed the longest average ROH  
467 in these isolated boreal caribou populations, confirming their inbreeding occurred recently. We  
468 observed the greatest amounts of inbreeding in caribou from western Greenland, whose genomes  
469 were approximately a third to a half in ROH; although their ROH were shorter than expected,  
470 implying inbreeding has occurred over a longer time in western Greenland than it has in Ontario.

471 Across populations with divergent demographic histories, we infer the maintenance of  
472 variation within genes associated with various functions, including immunity, the removal of  
473 toxins, and a deleterious recessive condition, suggesting balancing selection is occurring despite  
474 extreme inbreeding. The maintenance of heterozygosity in these key regions may help resist the  
475 effects of inbreeding depression. To further investigate how inbreeding depression may be  
476 affecting these populations, researchers should examine beyond the islands of heterozygosity and

477 attempt to identify genes located within ROH, especially those that are likely to be associated  
478 with heterozygote advantage or a deleterious recessive allele.

479

480

## 481 **ACKNOWLEDGEMENTS**

482 Funding was provided through an NSERC Collaborative Research & Development (CRD) grant  
483 to P.J.W., NSERC CREATE and Discovery grants to J.B. and P.J.W., and a Garfield Weston  
484 Foundation Fellowship to K.S., Ontario Graduate Scholarships, and Ontario Species at Risk  
485 Stewardship Program funding to K.S. The results reported are reflective of the independent  
486 analyses conducted for this study and do not necessarily reflect the views of the Government of  
487 Ontario. We are grateful to Dr. Art Rodgers for his assistance with sample collection and advice  
488 on this paper. We thank Bridget Redquest and Austin Thompson for extracting DNA, and The  
489 Centre for Applied Genomics (TCAG) at the Hospital for Sick Children (Toronto, Ontario) for  
490 library preparation and sequencing. We also acknowledge the facilities of the Shared Hierarchical  
491 Academic Research Computing Network (SHARCNET: [www.sharcnet.ca](http://www.sharcnet.ca)) and Compute  
492 Canada/ Calcul Canada gme-665-ab. Compute Canada (RRG gme-665-ab), and Amazon Cloud  
493 Computing for high-performance computing services. We are grateful for the efforts of those  
494 who provided tissue samples including the Government of Manitoba, Government of  
495 Ontario, Government of Greenland, and Environment and Climate Change Canada.

496

497

498

499 **REFERENCES**

- 500 Agarwala, R., Barrett, T., Beck, J., Benson, D. A., Bollin, C., Bolton, E., ... Zbicz, K. (2016).  
501 Database resources of the National Center for Biotechnology Information. *Nucleic Acids*  
502 *Research*, 44(D1), D7–D19. doi: 10.1093/nar/gkv1290
- 503 Benazzo, A., Trucchi, E., Cahill, J. A., Maisano Delsler, P., Mona, S., Fumagalli, M., ...  
504 Bertorelle, G. (2017). Survival and divergence in a small group: The extraordinary genomic  
505 history of the endangered Apennine brown bear stragglers. *Proceedings of the National*  
506 *Academy of Sciences*, 114(45), 1–9. doi: 10.1073/pnas.1707279114
- 507 Bera, T. K., Liu, X. F., Yamada, M., Gavrilova, O., Mezey, E., Tessarollo, L., ... Pastan, I.  
508 (2008). A model for obesity and gigantism due to disruption of the Ankrd26 gene.  
509 *Proceedings of the National Academy of Sciences of the United States of America*, 105(1),  
510 270–275. doi: 10.1073/pnas.0710978105
- 511 Bergerud, A. T., Dalton, W. J., Butler, H., Camps, L., & Ferguson, R. (2007). Woodland caribou  
512 persistence and extirpation in relic populations on Lake Superior. *Rangifer*, 27(17), 57–78.
- 513 Borba, V. V., Zandman-Goddard, G., & Shoenfeld, Y. (2018). Prolactin and autoimmunity.  
514 *Frontiers in Immunology*, 9(FEB), 1–8. doi: 10.3389/fimmu.2018.00073
- 515 Broad Institute. (n.d.). *Picard*. Retrieved from <http://broadinstitute.github.io/picard>
- 516 Cavedon, M., Gubili, C., Heppenheimer, E., vonHoldt, B., Mariani, S., Hebblewhite, M., ...  
517 Musiani, M. (2019). Genomics, environment and balancing selection in behaviourally  
518 bimodal populations: The caribou case. *Molecular Ecology*, 28(8), 1946–1963. doi:  
519 10.1111/mec.15039
- 520 Ceballos, F. C., Joshi, P. K., Clark, D. W., Ramsay, M., & Wilson, J. F. (2018). Runs of  
521 homozygosity: Windows into population history and trait architecture. *Nature Reviews*  
522 *Genetics*, 19(4), 220–234. doi: 10.1038/nrg.2017.109
- 523 Charlesworth, D., & Willis, J. H. (2009). The genetics of inbreeding depression. *Nature Reviews*  
524 *Genetics*, 10, 783–796.
- 525 COSEWIC. (2011). *Designatable Units for Caribou (Rangifer tarandus) in Canada*. 88pp.  
526 Retrieved from  
527 [http://www.cosewic.gc.ca/eng/sct12/COSEWIC\\_Caribou\\_DU\\_Report\\_23Dec2011.pdf](http://www.cosewic.gc.ca/eng/sct12/COSEWIC_Caribou_DU_Report_23Dec2011.pdf)
- 528 COSEWIC. (2014a). *COSEWIC assessment and status report on the Caribou Rangifer tarandus,*  
529 *Newfoundland population, Atlantic-Gaspésie population and Boreal population, in Canada*.  
530 Ottawa: Committee on the Status of Endangered Wildlife in Canada. Retrieved from  
531 Committee on the Status of Endangered Wildlife in Canada website: [www.registrelep-](http://www.registrelep-sararegistry.gc.ca/default_e.cfm)  
532 [sararegistry.gc.ca/default\\_e.cfm](http://www.registrelep-sararegistry.gc.ca/default_e.cfm)
- 533 COSEWIC. (2014b). *COSEWIC assessment and Status Report on the Caribou Rangifer*  
534 *tarandus, Northern Mountain Population, Central Mountain Population and Southern*  
535 *Mountain Population in Canada*. Retrieved from  
536 [http://www.sararegistry.gc.ca/virtual\\_sara/files/cosewic/sr\\_Caribou\\_Northern\\_Central\\_Sout](http://www.sararegistry.gc.ca/virtual_sara/files/cosewic/sr_Caribou_Northern_Central_Southern_2014_e.pdf)  
537 [hern\\_2014\\_e.pdf](http://www.sararegistry.gc.ca/virtual_sara/files/cosewic/sr_Caribou_Northern_Central_Southern_2014_e.pdf)
- 538 COSEWIC. (2015). COSEWIC Assessment and Status Report on the Peary Caribou Rangifer  
539 tarandus pearyi in Canada. In *Species at Risk Public Registry*.
- 540 COSEWIC. (2016). COSEWIC assessment and status report on the caribou Rangifer tarandus,  
541 barren-ground population, in Canada. In *Committee on the Status of Endangered Wildlife in*

- 542 Canada. Retrieved from [http://www.registrelep-](http://www.registrelep-sararegistry.gc.ca/default.asp?lang=en&n=24F7211B-1)  
543 [sararegistry.gc.ca/default.asp?lang=en&n=24F7211B-1](http://www.registrelep-sararegistry.gc.ca/default.asp?lang=en&n=24F7211B-1)
- 544 COSEWIC. (2017a). COSEWIC assessment and status report on the caribou *Rangifer tarandus*,  
545 Eastern Migratory population and Torngat Mountains population, in Canada. In *Committee*  
546 *on the Status of Endangered Wildlife in Canada*. Retrieved from [http://www.registrelep-](http://www.registrelep-sararegistry.gc.ca/default.asp?lang=en&n=24F7211B-1)  
547 [sararegistry.gc.ca/default.asp?lang=en&n=24F7211B-1](http://www.registrelep-sararegistry.gc.ca/default.asp?lang=en&n=24F7211B-1)
- 548 COSEWIC. (2017b). COSEWIC Assessment and Status Report on the Caribou *Rangifer tarandus*  
549 Dolphin and Union population in Canada. In *Committee on the Status of Endangered*  
550 *Wildlife in Canada*. Retrieved from [https://wildlife-species.canada.ca/species-risk-](https://wildlife-species.canada.ca/species-risk-registry/virtual_sara/files/cosewic/srCaribouDolphinUnion2017e1.pdf)  
551 [registry/virtual\\_sara/files/cosewic/srCaribouDolphinUnion2017e1.pdf](https://wildlife-species.canada.ca/species-risk-registry/virtual_sara/files/cosewic/srCaribouDolphinUnion2017e1.pdf)
- 552 Couturier, S., Courtois, R., Crépeau, H., Rivest, L.-P., & Luttich, S. (1996). Calving photocensus  
553 of the Rivière George Caribou Herd and comparison with an independent census. *Rangifer*,  
554 *16*(4), 283. doi: 10.7557/2.16.4.1268
- 555 Cuyler, C., & Østergaard, J. B. (2005). Fertility in two West Greenland caribou *Rangifer tarandus*  
556 *groenlandicus* populations during 1996/97: Potential for rapid growth. *Wildlife Biology*,  
557 *11*(3), 221–227. doi: 10.2981/0909-6396(2005)11[221:FITWGC]2.0.CO;2
- 558 Danecek, P., Auton, A., Abecasis, G., Albers, C. A., Banks, E., DePristo, M. A., ... Durbin, R.  
559 (2011). The variant call format and VCFtools. *Bioinformatics*, *27*(15), 2156–2158. doi:  
560 10.1093/bioinformatics/btr330
- 561 Drake, C. C., Manseau, M., Klütsch, C. F. C., Priadka, P., Wilson, P. J., Kingston, S., & Carr, N.  
562 (2018). Does connectivity exist for remnant boreal caribou (*Rangifer tarandus caribou*)  
563 along the Lake Superior Coastal Range? Options for landscape restoration. *Rangifer*, *38*(1),  
564 13. doi: 10.7557/2.38.1.4124
- 565 Festa-Bianchet, M., Ray, J. C., Boutin, S., Côté, S. D., & Gunn, A. (2011). Conservation of  
566 caribou (*Rangifer tarandus*) in Canada: an uncertain future. *Canadian Journal of Zoology*,  
567 *89*(5), 419–434. doi: 10.1139/z11-025
- 568 Fletcher, R. (2017, November 14). Wolf, caribou issue on Michipicoten Island raises red flags for  
569 many. *Sault Star*. Retrieved from [http://www.saultstar.com/2017/11/13/wolf-caribou-issue-](http://www.saultstar.com/2017/11/13/wolf-caribou-issue-on-michipicoten-island-raises-red-flags-for-many)  
570 [on-michipicoten-island-raises-red-flags-for-many](http://www.saultstar.com/2017/11/13/wolf-caribou-issue-on-michipicoten-island-raises-red-flags-for-many)
- 571 Gagnon, M., Yannic, G., Perrier, C., & Côté, S. D. (2019). No evidence of inbreeding depression  
572 in fast declining herds of migratory caribou. *Journal of Evolutionary Biology*, (August), 1–  
573 14. doi: 10.1111/jeb.13533
- 574 Gilpin, M. E., & Soule, M. E. (1986). Minimum viable populations: processes of extinction. In  
575 M. . Soule (Ed.), *Conservation Biology: The Science of Scarcity and Diversity* (pp. 19–34).  
576 Sunderland, MA: Sinauer Associates.
- 577 Hammerly, S., Morrow, M. E., & Johnson, J. A. (2013). A comparison of pedigree- and DNA-  
578 based measures for identifying inbreeding depression in the critically endangered Attwater's  
579 Prairie-chicken. *Molecular Ecology*, *22*, 5313–5328. doi: 10.1111/mec.12482
- 580 Hedrick, P. W., & Garcia-Dorado, A. (2016). Understanding Inbreeding Depression, Purging,  
581 and Genetic Rescue. *Trends in Ecology and Evolution*, *31*(12), 940–952. doi:  
582 10.1016/j.tree.2016.09.005
- 583 Herfindal, I., Haanes, H., Røed, K. H., Solberg, E. J., Markussen, S. S., Heim, M., & Sæther, B.-  
584 E. (2014). Population properties affect inbreeding avoidance in moose. *Biology Letters*,  
585 *10*(12), 20140786–20140786. doi: 10.1098/rsbl.2014.0786
- 586 Jepsen, B. I., Siegismund, H. R., & Fredholm, M. (2002). Population genetics of the native



- 587 caribou (*Rangifer tarandus groenlandicus*) and the semi-domestic reindeer (*Rangifer*  
588 *tarandus tarandus*) in Southwestern Greenland: Evidence of introgression. *Conservation*  
589 *Genetics*, 3(4), 401–409. doi: 10.1023/A:1020523303815
- 590 Kardos, M., Åkesson, M., Fountain, T., Flagstad, Ø., Liberg, O., Olason, P., ... Ellegren, H.  
591 (2018). Genomic consequences of intensive inbreeding in an isolated wolf population.  
592 *Nature Ecology & Evolution*, (2), 124–131. doi: 10.1038/s41559-017-0375-4
- 593 Kardos, M., Luikart, G., & Allendorf, F. W. (2015). Measuring individual inbreeding in the age  
594 of genomics: marker-based measures are better than pedigrees. *Heredity*, 115(1), 63–72. doi:  
595 10.1038/hdy.2015.17
- 596 Krueger, F. (2012). Trim Galore! Retrieved from  
597 [https://www.bioinformatics.babraham.ac.uk/projects/trim\\_galore/](https://www.bioinformatics.babraham.ac.uk/projects/trim_galore/)
- 598 Kuchta, B. (2012). *Bottom-up and Top-down Forces Shaping Caribou Forage Availability on the*  
599 *Lake Superior Coast*. Lakehead University.
- 600 Laliberte, A. S., & Ripple, W. J. (2004). Range Contractions of North American Carnivores and  
601 Ungulates. *BioScience*, 54(2), 123. doi: 10.1641/0006-  
602 3568(2004)054[0123:RCONAC]2.0.CO;2
- 603 Langmead, B., & Salzberg, S. L. (2012). Fast gapped-read alignment with Bowtie 2. *Nature*  
604 *Methods*, 9, 357–359.
- 605 Manichaikul, A., Mychaleckyj, J. C., Rich, S. S., Daly, K., Sale, M., & Chen, W. M. (2010).  
606 Robust relationship inference in genome-wide association studies. *Bioinformatics*, 26(22),  
607 2867–2873. doi: 10.1093/bioinformatics/btq559
- 608 Martin, M. (2011). Cutadapt removes adapter sequences from high-throughput sequencing reads.  
609 *EMBnet.Journal*, 17, 10–12.
- 610 Miners, J. O., McKinnon, R. A., & Mackenzie, P. I. (2002). Genetic polymorphisms of UDP-  
611 glucuronosyltransferases and their functional significance. *Toxicology*, 181–182, 453–456.  
612 doi: 10.1016/S0300-483X(02)00449-3
- 613 National Center for Biotechnology Information. (2016). Genome Assembly and Annotation  
614 report *Bos taurus* (cattle). Retrieved November 29, 2020, from NCBI website:  
615 <https://www.ncbi.nlm.nih.gov/genome/82>
- 616 Ontario Ministry of Natural Resources. (2009). *Ontario's Woodland Caribou Conservation Plan*.  
617 28pp.
- 618 Ontario Ministry of Natural Resources. (2018). *Seeking Advice on the Future of Caribou in the*  
619 *Lake Superior Coast Range*. Retrieved from  
620 [http://www.ecolog.com/daily\\_images/1004158029-1004159610.pdf](http://www.ecolog.com/daily_images/1004158029-1004159610.pdf)
- 621 Palkopoulou, E., Mallick, S., Skoglund, P., Enk, J., Rohland, N., Li, H., ... Dalén, L. (2015).  
622 Complete genomes reveal signatures of demographic and genetic declines in the woolly  
623 mammoth. *Current Biology*, 25(10), 1395–1400. doi: 10.1016/j.cub.2015.04.007
- 624 Polfus, J. L., Manseau, M., Simmons, D., Neyelle, M., Bayha, W., Andrew, F., & Andrew, L.  
625 (2016). *Łegha' Gots' Enete ( Learning Together )*: the Importance of Indigenous. In  
626 *Ecology and Society* (Vol. 21). doi: 10.5751/ES-08284-210218
- 627 Quinlan, A. R., & Hall, I. M. (2010). BEDTools: A flexible suite of utilities for comparing  
628 genomic features. *Bioinformatics*, 26(6), 841–842. doi: 10.1093/bioinformatics/btq033
- 629 Renaud, G., Hanghoj, K., Korneliussen, T. S., Willerslev, E., & Orland, L. (2019). Joint  
630 Estimates of Heterozygosity and Runs of Homozygosity for Modern and Ancient Samples.  
631 *Genetics*, 212(July), 587–614.

- 632 Saremi, N. F., Supple, M. A., Byrne, A., Cahill, J. A., Coutinho, L. L., Dalén, L., ... Shapiro, B.  
633 (2019). Puma genomes from North and South America provide insights into the genomic  
634 consequences of inbreeding. *Nature Communications*, *10*(1). doi: 10.1038/s41467-019-  
635 12741-1
- 636 Schaefer, J. A. (2003). Long-Term Range Recession and the Persistence of Caribou in the Taiga.  
637 *Conservation Biology*, *17*(5), 1435–1439. doi: 10.1046/j.1523-1739.2003.02288.x
- 638 Sommers, C. L., Rabin, R. L., Grinberg, A., Tsay, H. C., Farber, J., & Love, P. E. (1999). A role  
639 for the Tec family tyrosine kinase Txk in T cell activation and thymocyte selection. *Journal*  
640 *of Experimental Medicine*, *190*(10), 1427–1438. doi: 10.1084/jem.190.10.1427
- 641 Szpiech, Z. A., Xu, J., Pemberton, T. J., Peng, W., Zöllner, S., Rosenberg, N. A., & Li, J. Z.  
642 (2013). Long runs of homozygosity are enriched for deleterious variation. *American Journal*  
643 *of Human Genetics*, *93*(1), 90–102. doi: 10.1016/j.ajhg.2013.05.003
- 644 Taylor, R. S., Horn, R. L., Zhang, X., Brian Golding, G., Manseau, M., & Wilson, P. J. (2019).  
645 The Caribou (*Rangifer tarandus*) genome. *Genes*, *10*(7), 4–9. doi: 10.3390/genes10070540
- 646 Taylor, R. S., Manseau, M., Horn, R. L., Keobouasone, S., Golding, G. B., & Wilson, P. J.  
647 (2020). The role of introgression and ecotypic parallelism in delineating intra-specific  
648 conservation units. *Molecular Ecology*, (00), 1–17. doi: 10.1111/mec.15522
- 649 Thompson, L. M., Klütsch, C. F. C., Manseau, M., & Wilson, P. J. (2019). Spatial differences in  
650 genetic diversity and northward migration suggest genetic erosion along the boreal caribou  
651 southern range limit and continued range retraction. *Ecology and Evolution*, (April),  
652 ece3.5269. doi: 10.1002/ece3.5269
- 653 Wickham, H. (2016). *ggplot2: Elegant Graphics for Data Analysis*. New York.: Springer-Verlag.  
654 Retrieved from <https://ggplot2.tidyverse.org>  
655  
656  
657

658 **DATA ACCESSIBILITY**

659 The raw reads of 12 individuals are available at the National Centre for Biotechnology (NCBI)  
660 under the BioProject Accession no. PRJNA 634908. The raw reads of the remaining three  
661 individuals will be made available by time of publication.

662

663 **AUTHOR CONTRIBUTIONS**

664 K.S., J.B., P.J.W., and M.M. conceived and designed the study. J.B., P.J.W., and M.M. oversaw  
665 the research as Co-Principal Investigators. K.S. and S.K. performed bioinformatic analyses with  
666 guidance from R.S.T. and R.L.H. K.S. wrote the manuscript and J.B., R.S.T, M.M., and P.J.W.  
667 provided feedback and edited the manuscript.

668

669

670 **Tables**

671 **Table 1.** Information for each caribou included in this study: sampling locations and individual  
 672 reference number, subspecies classification and Canadian designatable units, population size and  
 673 extent of isolation, mean depth of coverage from whole genome mapped BAM files, and  
 674 inbreeding estimates.

| Location and Reference Number          | Subspecies           | Designatable Unit | Population Size | Extent of Isolation | Mean Depth | Inbreeding Coefficient (F) | F <sub>ROH</sub> | Mean Length ROH |
|----------------------------------------|----------------------|-------------------|-----------------|---------------------|------------|----------------------------|------------------|-----------------|
| Ontario Michipicoten Island 39650      | <i>R. t. caribou</i> | Boreal            | Small           | High                | 33.6775    | 0.2167                     | 0.1664           | 453134          |
| Ontario Michipicoten Island 39651      | <i>R. t. caribou</i> | Boreal            | Small           | High                | 35.9172    | 0.2092                     | 0.1000           | 301072          |
| Ontario Pukaskwa National Park 39653   | <i>R. t. caribou</i> | Boreal            | Small           | High                | 36.3265    | 0.3897                     | 0.1902           | 276247          |
| Ontario Cochrane 39654                 | <i>R. t. caribou</i> | Boreal            | Small           | Low                 | 36.4583    | 0.0656                     | 0.0403           | 173556          |
| Ontario Ignace 39590                   | <i>R. t. caribou</i> | Boreal            | Small           | Moderate            | 28.0951    | 0.2398                     | 0.2310           | 556507          |
| Manitoba (The Pas) Naosap herd 35324   | <i>R. t. caribou</i> | Boreal            | Small           | Low                 | 30.3958    | 0.0463                     | 0.0963           | 255161          |
| Manitoba (Snow Lake) Naosap herd 35326 | <i>R. t. caribou</i> | Boreal            | Small           | Low                 | 34.9286    | 0.0358                     | 0.0367           | 152613          |

|                                                |                                |                      |        |      |         |         |        |        |
|------------------------------------------------|--------------------------------|----------------------|--------|------|---------|---------|--------|--------|
| Manitoba<br>Qamanirijuaq<br>herd 21332         | <i>R. t.<br/>groenlandicus</i> | Barren-<br>ground    | Large  | Low  | 31.8765 | -0.0833 | 0.0123 | 164607 |
| Manitoba<br>Qamanirijuaq<br>herd 21350         | <i>R. t.<br/>groenlandicus</i> | Barren-<br>ground    | Large  | Low  | 30.7167 | -0.0868 | 0.0137 | 152570 |
| Quebec<br>George River<br>herd 27689           | <i>R. t. caribou</i>           | Eastern<br>migratory | Medium | Low  | 31.6268 | 0.0576  | 0.0689 | 208165 |
| Quebec<br>George River<br>herd 27694           | <i>R. t. caribou</i>           | Eastern<br>migratory | Medium | Low  | 32.3503 | 0.0330  | 0.0534 | 151553 |
| Ontario Pen<br>Island herd<br>20917            | <i>R. t. caribou</i>           | Eastern<br>migratory | Medium | Low  | 29.4896 | 0.0062  | 0.0598 | 151538 |
| Ontario Pen<br>Island herd<br>34590            | <i>R. t. caribou</i>           | Eastern<br>migratory | Medium | Low  | 31.5274 | 0.0276  | 0.0679 | 211619 |
| Western<br>Greenland<br>Kangerlussuaq<br>41660 | <i>R. t.<br/>groenlandicus</i> | n/a                  | Small  | High | 33.1561 | 0.5800  | 0.3373 | 308640 |
| Western<br>Greenland<br>Kangerlussuaq<br>41667 | <i>R. t.<br/>groenlandicus</i> | n/a                  | Small  | High | 30.3475 | 0.5877  | 0.5017 | 433852 |

676 **Figures**

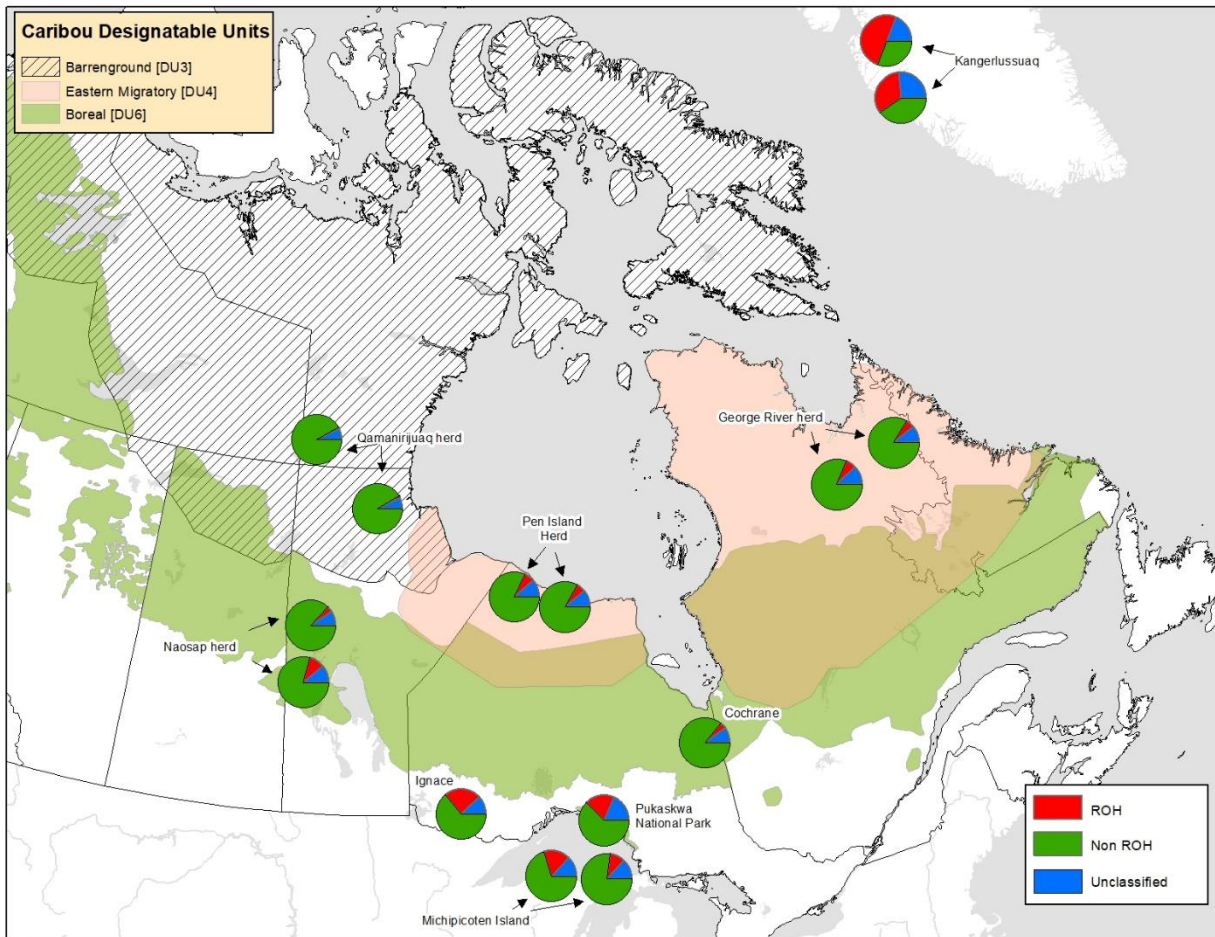

677  
678 **FIGURE 1** Sample sites of caribou in this study. Background colours show the ranges of the  
679 three Canadian designatable units included: barren-ground, eastern migratory, and boreal. Labels  
680 on map reflect caribou population names. Pie charts represent the genomic level of inbreeding as  
681 the proportion of the genome in ROH, non-ROH, or unclassified for each individual (N=15), at  
682 the location that each sample was collected.

683

684

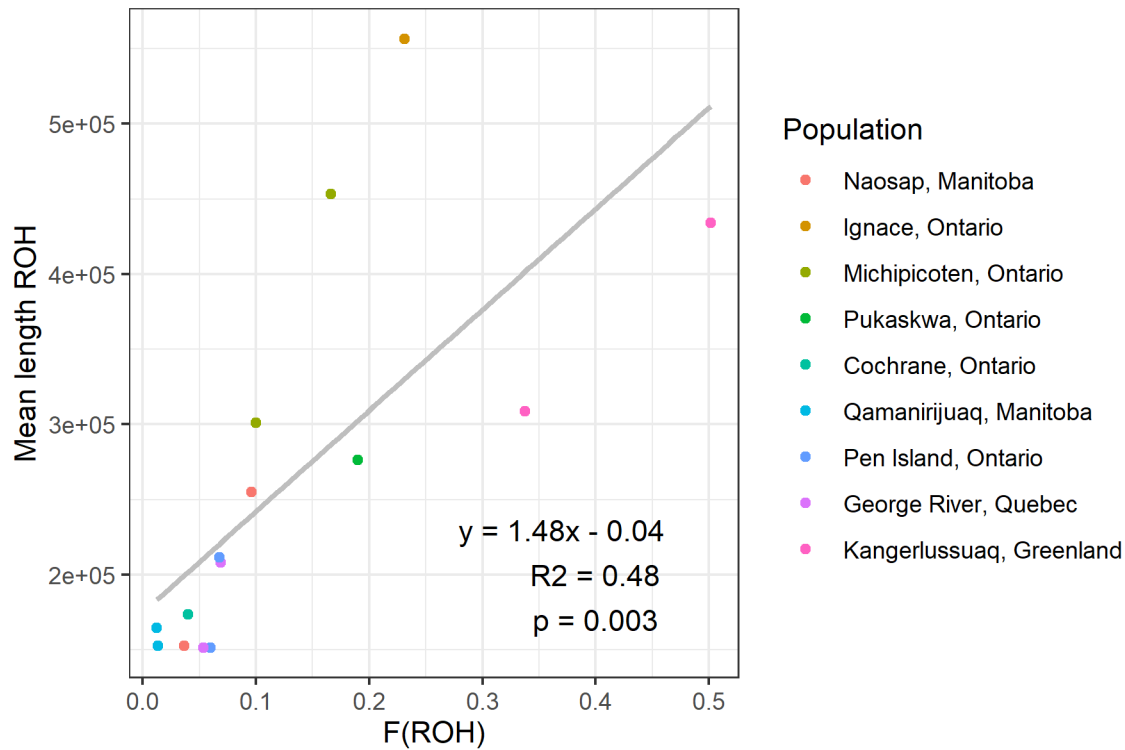

685

686 **FIGURE 2** Proportion of the genome in ROH ( $F_{ROH}$ ) versus average length of ROH for each  
687 caribou based on high coverage whole genome sequences. Individuals are coloured by the  
688 population they were sampled from. The equation describes the line of best fit and  $R^2$  is the  
689 adjusted R-squared value.

690

691

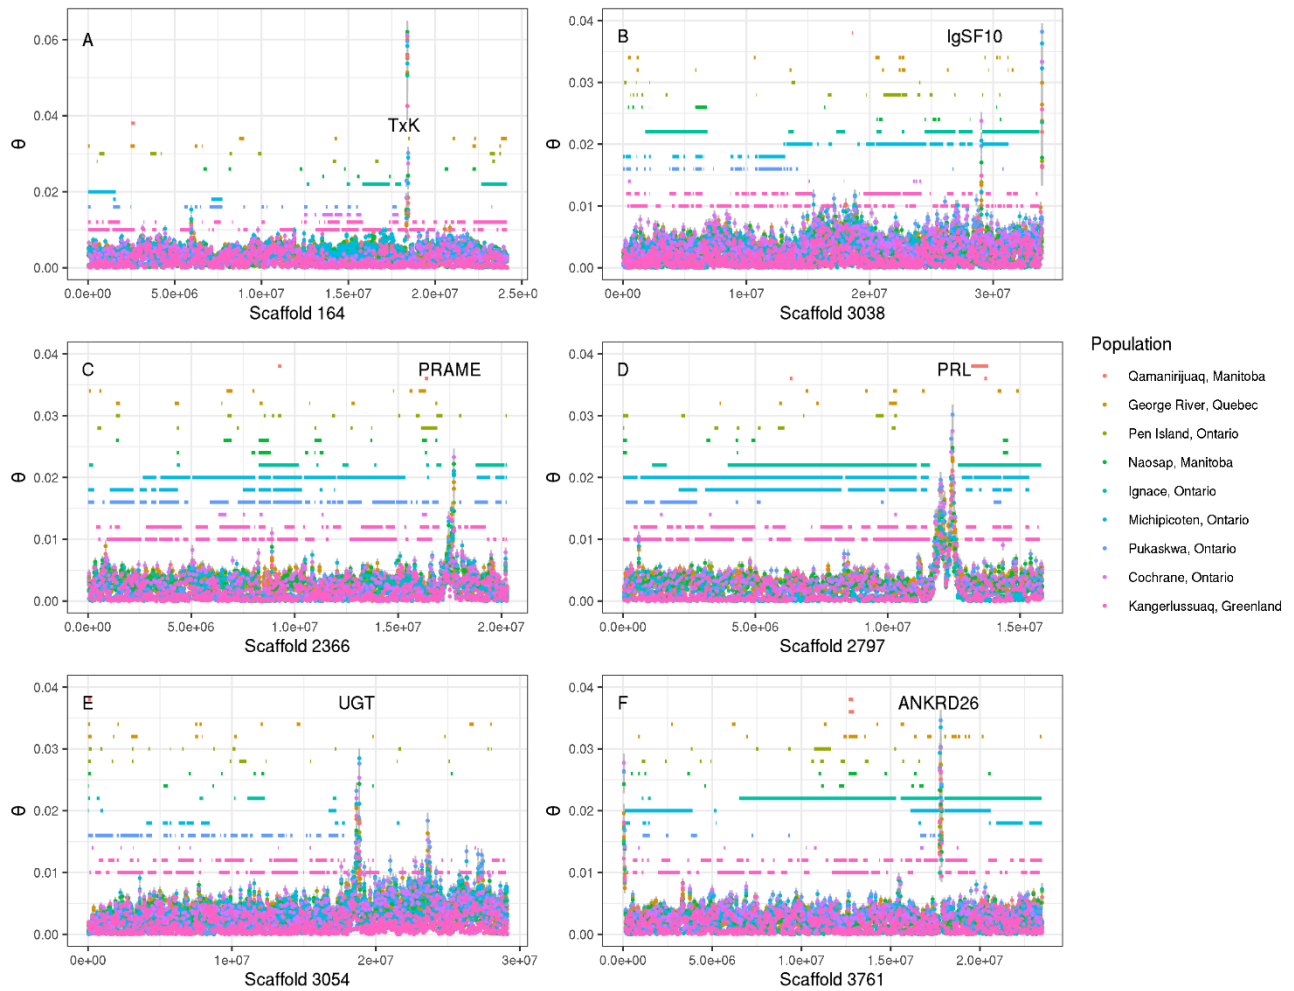

692

693 **FIGURE 3** Heterozygosity estimates and Runs of Homozygosity (ROH) across select scaffolds  
694 of the caribou genome. Points represent local heterozygosity estimates calculated as Waterson's  $\theta$   
695 every 50kb for each individual, with standard error bars. Horizontal line segments represent  
696 locations of ROH predicted by a hidden markov model for each individual. Colours represent  
697 caribou populations. Annotated labels on plots refer to genes identified within islands of  
698 heterozygosity. Note the Y-axis of plot A is 0.06; the Y-axes of plots B-F is 0.04.

699

700
